# Supplementary material
Source: PubMed Central journal article supplement (PMC5754756)
Supplement: pnas.1702436114.sapp.pdf [file pnas.1702436114.sapp.pdf]

# The Relationship Between Season of Birth, Temperature Exposure, and Later Life Well-Being, Supplementary Appendix

Adam Isen<sup>a,1</sup>, Maya Rossin-Slater<sup>b,1,2</sup>, and Reed Walker<sup>c,1</sup>

<sup>a</sup>Office of Tax Analysis, Department of the Treasury; <sup>b</sup>Stanford University School of Medicine, IZA, and NBER; <sup>c</sup>University of California, Berkeley, IZA, and NBER

**Supporting Information (SI).** This supplementary appendix begins by providing additional details regarding data construction. We then present and discuss additional results that support the main conclusions of our study:

## Additional Data Discussion.

**Longitudinal Employer Household Dynamic Files.** Although the LEHD provides essential information for studying the long-run effects of early-life circumstances for a large fraction of the U.S. workforce, several limitations exist. First, the LEHD is assembled by combining various state’s administrative earnings records. This means that states have varying degrees of temporal coverage in the main dataset, with most participating states entering the sample by the late 1990s. The second challenge is that it is not possible to distinguish between unemployment and non-participation. For example, we would observe a missing earnings record for an individual both if he/she were to move to a state not covered in the LEHD and if he/she became unemployed or self-employed in a given year. Since our treatment variable may also covary with this form of sample attrition, we are careful to construct a sample that tries to address such concerns.

Specifically, we limit our sample to the 24 states that continuously contain earnings records between 1998-2007.\* Furthermore, we limit the analysis sample to individuals who were born in one of those 24 states.† Workers are able to move from their state of birth to other states, but they are only in our sample if they ever work in one of these 24 states between 1998-2007.

**Fine-Scaled Weather Data.** The underlying data come from a 2.5km×2.5km grid for the contiguous United States and were produced by (23). In order to preserve the influence of temperature extremes, we first count the number of days in each of the respective temperature bins for every 2.5km×2.5km grid×day, and then we average the grids to the county×day, weighting by the 2000 Census Block population in which the grid centroid is located. Lastly, for each county×date-of-birth, we sum the temperature bins over the various focal periods

(e.g., the total number of days with mean temperature between 20-24C in the first trimester).

**Additional Results.** Below, we present and discuss additional results that support the main conclusions of our study: (1) exposure to days with very hot temperatures in the prenatal period and in the first year of life lowers average annual earnings at ages 29-31, and (2) household AC adoption mitigates nearly all of this observed reduction.

Table S1 presents summary statistics, both for the overall sample and also by region. We classify our data into regions based on the Census Bureau’s definition of a Census Region. There is substantial heterogeneity in temperature and average annual earnings between ages 29 and 31. Areas in the Northeast experience far fewer days above 32C than areas in the Southwest. These translate to differences in the average number of days during various critical periods of a child’s development spent in different temperature bins (Panel B). In addition, the Western states in our sample experienced some of the smallest changes in AC penetration relative to the states with hotter climates in the South.

In Fig. S1, we examine the residual variation in earnings by month of birth and correlate it with the residual variation in extreme temperatures experienced during gestation by birth month. Fig. S1a plots average days during gestation for which the average daily temperature exceeded 32C, conditional on county-of-birth×race×sex fixed effects. Fig. S1b similarly plots the conditional average earnings by month of birth for individuals in our sample.‡

Next, while Table 1 presented results from a single regression model that included all critical periods jointly, Table S2 instead shows coefficients from *separate* regression models, one for each critical period indicated in each row. The magnitudes reported in Tables 1 and S2 are similar, suggesting that the effects of a temperature episode in one period of development may be independent of temperature variation in other periods.

Table S3 explores the robustness of our results to a variety of different control variables. In order to economize on reported coefficients, we report estimates for a single “summary” critical period, gestation. We focus on different variants of model 2, which includes interactions with AC penetration. Column (1) presents the cross-sectional OLS results relating earnings at ages 29-31 to temperature exposures during

‡The conditional average measures in both Figs. S1a and S1b come from a regression using the individual microdata, where the dependent variable is either earnings or temperature, and we include a set of fixed effects for birth month, a set of fixed effects for county-of-birth×race×sex, and a set of year fixed effects. Figs. and S1a and S1b plot the coefficients from the birth month fixed effects, all measured relative to December births.

\*We exclude the year 2008 from our analysis both because some states only have partial quarterly coverage in 2008. The states in our sample include: CA, CO, FL, GA, ID, IL, IN, LA, MD, ME, MT, NC, NJ, NM, OR, RI, TX, WA, WI, WV, TN, SC, NV, and VA. Total non-farm employment in these 24 states accounted for 61 percent of the total U.S. non-farm workforce in 2000.

†Formally, we take the full sample of individuals who ever worked in one these 24 states in the years for which the state is covered within the LEHD by pooling over the individuals in the LEHD Individual Characteristics Files for all 24 states.

**Table S1. Summary Statistics**

| Panel A: Sample Means By Region |           |                  |       |                          |       |       |           |
|---------------------------------|-----------|------------------|-------|--------------------------|-------|-------|-----------|
|                                 | Earnings  | Air Conditioning |       | Temperature Descriptives |       |       |           |
|                                 | Age 29-31 | 1960             | 1980  | Mean                     | Min   | Max   | # of Days |
|                                 | (1)       | (2)              | (3)   | (4)                      | (5)   | (6)   | (7)       |
| Overall                         | 24117.69  | 14.70            | 57.88 | 14.66                    | 8.48  | 20.85 | 0.32      |
| Census Region                   |           |                  |       |                          |       |       |           |
| Midwest                         | 26314.44  | 10.97            | 58.19 | 9.95                     | 4.43  | 15.46 | 0.01      |
| Northeast                       | 25489.36  | 13.14            | 52.90 | 10.68                    | 5.22  | 16.15 | 0.00      |
| South                           | 22705.62  | 20.05            | 72.19 | 17.50                    | 11.37 | 23.62 | 0.75      |
| West                            | 24734.85  | 8.76             | 35.70 | 13.91                    | 7.03  | 20.79 | 0.23      |

  

| Panel B: Average Number of Days By Focal Period |           |           |           |           |        |        |        |
|-------------------------------------------------|-----------|-----------|-----------|-----------|--------|--------|--------|
|                                                 | 1st       | 2nd       | 3rd       | Total     | 0-3    | 3-6    | 6-12   |
|                                                 | Trimester | Trimester | Trimester | Gestation | Months | Months | Months |
| Days below 0C                                   | 6.92      | 6.53      | 6.47      | 20.08     | 6.99   | 7.20   | 14.05  |
| Days 0-24C                                      | 66.94     | 65.83     | 64.79     | 199.05    | 67.83  | 67.73  | 137.56 |
| Days 24-28C                                     | 12.24     | 12.67     | 12.78     | 37.98     | 12.42  | 12.33  | 26.93  |
| Days 28-32C                                     | 2.80      | 2.86      | 2.85      | 8.57      | 2.65   | 2.64   | 6.25   |
| Days above 32C                                  | 0.10      | 0.11      | 0.11      | 0.32      | 0.10   | 0.10   | 0.21   |

NOTE: Panel A presents summary statistics for the overall sample and by region. Column (1) is the primary dependent variable in the paper, which is measured as mean annual earnings of an individual between 29-31 and comes from the LEHD. Columns (2) and (3) of Panel A report the average fraction of households in our sample in 1960 and 1980 who have air conditioning as reported in the Decennial Census. These averages are constructed by taking the population weighted average over the county level variable. Columns (4)-(6) report the population weighted temperature moments in our sample. Column (7) reports the population weighted average number of days above 32C per year. Panel B reports the average number of days during various critical periods of a child’s development (indicated in column) spent in each of the respective temperature bins (indicated in rows). The temperature data come from (23).

gestation, controlling for race, sex, and year of birth fixed effects. Column (2) adds county of birth fixed effects which reduce some of the residual variation in the cross-sectional estimates, while also controlling for time-invariant, observed or unobserved county-level determinants of later-life well-being. Column (3) adds fixed effects by month of birth to attempt to control for any seasonal determinants of earnings (such as socio-economic status and compulsory schooling laws); results remain similar. Column (4) adds fixed effects for county×day-of-year to control more granularly for seasonality in later life outcomes by day of year. Column (6) adds county×day-of-year×race×sex fixed effects, as in our main specifications. Column (6) adds birth-state-specific linear time trends, while Column (7) includes birth-state×birth-year fixed effects in addition to the race×sex×birth-county×birth-day-of-year fixed effects. In sum, Table S3 suggests that the non-linear influence of temperature exposure *in utero* is robust across model specifications—the number of days during gestation for which the average daily temperature exceeded 32C predicts worse outcomes measured 30 years later, but a large fraction of this effect is mitigated by AC adoption.

Next, we explore how temperature exposure during gestation affects the shape of the income distribution for affected cohorts relative to a counterfactual.<sup>§</sup> We begin by constructing a counterfactual earnings distribution for each county×race×sex by focusing on individuals in each county×race×sex cell for which the daily average temperature during gestation did

not exceed 32C. We then calculate the 1st, 5th, 10th, 25th, 50th, 75th, 90th, 95th, and 99th percentiles of the earnings for this set of individuals (separately by county×race×sex). We then classify all individuals into bins based on their place in the “counterfactual” earnings distribution of a particular county×race×sex. Thus, the dependent variable represents the fraction of all individuals in the specified percentile of the sub-32C earnings distribution. Table S4 presents results from 10 separate regressions, one for each quantile. The estimates suggest that the number of days with average temperatures exceeding 32C during gestation is correlated with an increase in the likelihood of being in the bottom half of the earnings distribution and a decrease in the likelihood of being in the top half of the earnings distribution. One interpretation of this result is that the observed mean earnings impacts are driven both by the extensive and the intensive margins.

<sup>§</sup>Our very large sample sizes preclude us from estimating quantile treatment effects directly using our micro data.

249  
250  
251  
252  
253  
254  
255  
256  
257  
258  
259  
260  
261  
262  
263  
264  
265  
266  
267  
268  
269  
270  
271  
272  
273  
274  
275  
276  
277  
278  
279  
280  
281  
282  
283  
284  
285  
286  
287  
288  
289  
290  
291  
292  
293  
294  
295  
296  
297  
298  
299  
300  
301  
302  
303  
304  
305  
306  
307  
308  
309  
310

311  
312  
313  
314  
315  
316  
317  
318  
319  
320  
321  
322  
323  
324  
325  
326  
327  
328  
329  
330  
331  
332  
333  
334  
335  
336  
337  
338  
339  
340  
341  
342  
343  
344  
345  
346  
347  
348  
349  
350  
351  
352  
353  
354  
355  
356  
357  
358  
359  
360  
361  
362  
363  
364  
365  
366  
367  
368  
369  
370  
371  
372

**Fig. S1. Conditional Temperature Exposure and Average Earnings by Month of Birth**

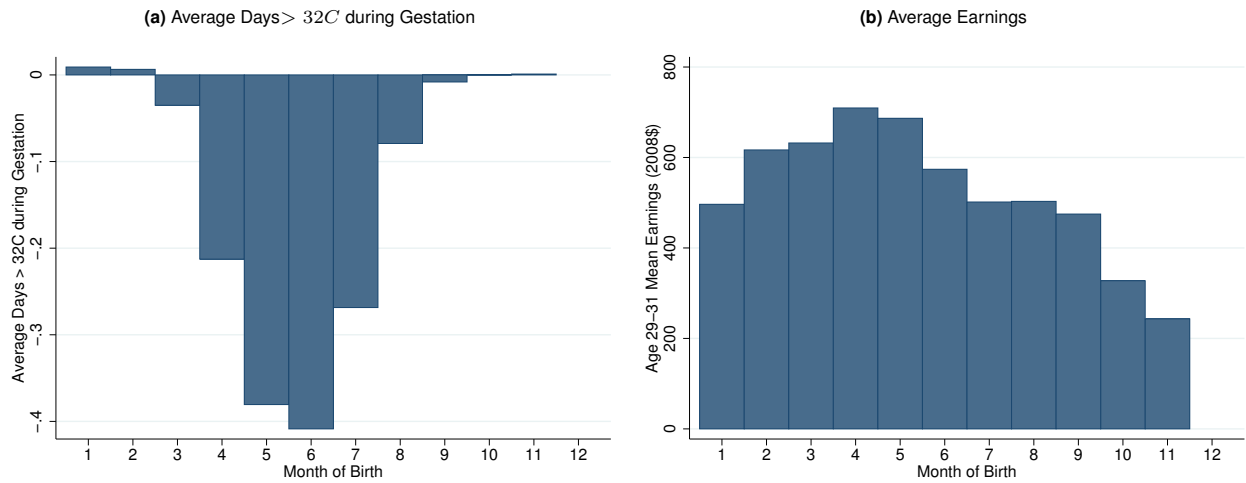

NOTE: Each figure plots the coefficient estimates from month of birth indicators, with December the representing the excluded category. Panel A plots the month of birth coefficients coming from a regression of number of days during gestation for which the daily average temperature exceed 32C regressed against county×race×sex fixed effects, year fixed effects, and month fixed effects. Panel B plots the month of birth estimates from a regression of average earnings between 29-31 years old (2008\$), controlling for county×race×sex fixed effects, year fixed effects, and month fixed effects. An auxiliary regression comparing the 11 observations in Panel B with the 11 observations in Panel A delivers an R-squared of 0.25.

**Table S2. Effects of Temperature over Different Critical Periods on Age 29-31 Annual Earnings**

|               | # Days<br><0C     | # Days<br>24-28C  | # Days<br>28-32C  | # Days<br>32+C        |
|---------------|-------------------|-------------------|-------------------|-----------------------|
|               | (1a)              | (1b)              | (1c)              | (1d)                  |
| Gestation     | 1.303<br>(4.051)  | -0.534<br>(1.719) | -3.434<br>(3.941) | -28.230*<br>(14.714)  |
| 1st Trimester | 1.912<br>(4.407)  | -0.489<br>(2.577) | -2.997<br>(4.623) | -43.252**<br>(19.966) |
| 2nd Trimester | 3.632<br>(4.036)  | -0.369<br>(2.186) | -0.091<br>(5.248) | -9.526<br>(22.160)    |
| 3rd Trimester | -1.334<br>(4.167) | 0.422<br>(2.701)  | -5.492<br>(4.438) | -34.572**<br>(16.933) |
| 0-3 Months    | -1.469<br>(3.010) | -2.643<br>(2.632) | -7.185<br>(4.966) | -30.439**<br>(13.507) |
| 3-6 Months    | -2.888<br>(3.839) | -1.115<br>(2.585) | -6.521<br>(6.498) | -33.225**<br>(16.124) |
| 6-12 Months   | -2.936<br>(3.176) | -1.654<br>(2.188) | -3.248<br>(2.745) | -34.316<br>(23.271)   |

NOTE: This table reports regression coefficients from 7 separate regressions, one per row, each corresponding to a version of Equation (1) in the text. Robust standard errors, clustered by state, are in parentheses. All regressions control for birth-county×day-of-year×race×sex fixed effects, year fixed effects, and a cubic polynomial in precipitation. \*\*\*p< 0.01, \*\*p< 0.05, \*p< 0.1.

373  
374  
375  
376  
377  
378  
379  
380  
381  
382  
383  
384  
385  
386  
387  
388  
389  
390  
391  
392  
393  
394  
395  
396  
397  
398  
399  
400  
401  
402  
403  
404  
405  
406  
407  
408  
409  
410  
411  
412  
413  
414  
415  
416  
417  
418  
419  
420  
421  
422  
423  
424  
425  
426  
427  
428  
429  
430  
431  
432  
433  
434

435  
436  
437  
438  
439  
440  
441  
442  
443  
444  
445  
446  
447  
448  
449  
450  
451  
452  
453  
454  
455  
456  
457  
458  
459  
460  
461  
462  
463  
464  
465  
466  
467  
468  
469  
470  
471  
472  
473  
474  
475  
476  
477  
478  
479  
480  
481  
482  
483  
484  
485  
486  
487  
488  
489  
490  
491  
492  
493  
494  
495  
496

**Table S3. Effect of Temperature During Gestation on Age 29-31 Annual Earnings: Model Sensitivity**

|                            | (1)                    | (2)                    | (3)                     | (4)                     | (5)                    | (6)                   | (7)                   |
|----------------------------|------------------------|------------------------|-------------------------|-------------------------|------------------------|-----------------------|-----------------------|
| # Days <0C                 | -51.992***<br>(11.808) | 11.971***<br>(2.612)   | 6.723**<br>(2.857)      | 18.266**<br>(7.661)     | 15.883**<br>(7.364)    | -3.551<br>(3.212)     | 0.748<br>(3.644)      |
| # Days 24-28C              | -28.765*<br>(14.819)   | -1.527<br>(2.657)      | 0.021<br>(2.996)        | -3.436<br>(4.931)       | -2.539<br>(4.989)      | 0.302<br>(3.999)      | -0.059<br>(3.791)     |
| # Days 28-32C              | -58.183***<br>(21.880) | -23.008**<br>(9.420)   | -19.816**<br>(9.011)    | -39.094***<br>(14.779)  | -40.384***<br>(15.438) | -24.971**<br>(11.653) | -34.672***<br>(9.688) |
| # Days 32+C                | -308.052*<br>(160.648) | -99.802***<br>(34.924) | -101.148***<br>(34.217) | -111.547***<br>(40.950) | -95.758**<br>(40.853)  | -46.944*<br>(27.097)  | -58.610**<br>(25.451) |
| # Days <0C × AC            | 182.060***<br>(27.876) | -13.207**<br>(6.497)   | -16.498***<br>(5.830)   | -55.537***<br>(13.981)  | -50.048***<br>(13.091) | -0.051<br>(8.089)     | -3.433<br>(8.553)     |
| # Days 24-28C × AC         | 34.116<br>(24.323)     | -4.071<br>(4.847)      | -1.007<br>(4.922)       | 6.063<br>(8.477)        | 4.873<br>(8.491)       | 0.008<br>(6.017)      | 3.987<br>(5.996)      |
| # Days 28-32C × AC         | 102.875***<br>(33.650) | 32.517**<br>(13.604)   | 29.721**<br>(13.015)    | 66.277***<br>(21.944)   | 66.339***<br>(22.840)  | 44.111**<br>(18.664)  | 59.158***<br>(16.997) |
| # Days 32+C × AC           | 327.112<br>(215.972)   | 123.156***<br>(47.215) | 127.810***<br>(46.786)  | 157.236***<br>(54.320)  | 127.144**<br>(54.329)  | 67.111<br>(42.917)    | 83.064**<br>(41.110)  |
| Race and Sex FE            | X                      | X                      | X                       | X                       |                        |                       |                       |
| County FE                  |                        | X                      | X                       |                         |                        |                       |                       |
| Birth Month FE             |                        |                        | X                       |                         |                        |                       |                       |
| County × DOY FE            |                        |                        |                         | X                       |                        |                       |                       |
| County × DOY × Race/Sex FE |                        |                        |                         |                         | X                      | X                     | X                     |
| State-Trends               |                        |                        |                         |                         |                        | X                     |                       |
| State × Year FE            |                        |                        |                         |                         |                        |                       | X                     |

NOTE: This table reports regression coefficients from 7 separate regressions, one per column, each corresponding to a version of Equation (2) in the text. Robust standard errors, clustered by state, are in parentheses. All regressions control for birth-county × day-of-year × race × sex fixed effects, year fixed effects, and a cubic polynomial in precipitation. \*\*\*p < 0.01, \*\*p < 0.05, \*p < 0.1.

497  
498  
499  
500  
501  
502  
503  
504  
505  
506  
507  
508  
509  
510  
511  
512  
513  
514  
515  
516  
517  
518  
519  
520  
521  
522  
523  
524  
525  
526  
527  
528  
529  
530  
531  
532  
533  
534  
535  
536  
537  
538  
539  
540  
541  
542  
543  
544  
545  
546  
547  
548  
549  
550  
551  
552  
553  
554  
555  
556  
557  
558

**Table S4. Effect of Temperature During Gestation on the Distribution of Earnings at Age 29-31**

|               | (1)<br>0 ≤ p ≤ 1  | (2)<br>1 < p ≤ 5  | (3)<br>5 < p ≤ 10 | (4)<br>10 < p ≤ 25 | (5)<br>25 < p ≤ 50  | (6)<br>50 ≤ p ≤ 75 | (7)<br>75 < p ≤ 90   | (8)<br>90 < p ≤ 95 | (9)<br>95 < p ≤ 99 | (10)<br>99 < p ≤ 100 |
|---------------|-------------------|-------------------|-------------------|--------------------|---------------------|--------------------|----------------------|--------------------|--------------------|----------------------|
| # Days < 0C   | -0.003<br>(0.010) | -0.029<br>(0.025) | -0.015<br>(0.023) | 0.050<br>(0.036)   | -0.002<br>(0.040)   | -0.004<br>(0.039)  | 0.026<br>(0.044)     | -0.010<br>(0.025)  | -0.020<br>(0.019)  | 0.008<br>(0.012)     |
| # Days 24-28C | 0.008<br>(0.007)  | 0.002<br>(0.013)  | -0.014<br>(0.016) | -0.024<br>(0.025)  | 0.016<br>(0.029)    | 0.030<br>(0.029)   | -0.041<br>(0.026)    | 0.018<br>(0.015)   | 0.003<br>(0.015)   | 0.001<br>(0.008)     |
| # Days 28-32C | 0.002<br>(0.012)  | -0.025<br>(0.026) | 0.005<br>(0.025)  | 0.009<br>(0.042)   | 0.085*<br>(0.043)   | 0.011<br>(0.057)   | -0.066<br>(0.047)    | 0.010<br>(0.024)   | -0.021<br>(0.025)  | -0.010<br>(0.017)    |
| # Days 32+C   | 0.118<br>(0.100)  | -0.114<br>(0.091) | 0.037<br>(0.120)  | 0.478**<br>(0.189) | 0.401***<br>(0.149) | -0.353*<br>(0.199) | -0.407***<br>(0.136) | -0.001<br>(0.074)  | -0.007<br>(0.114)  | -0.153<br>(0.122)    |

NOTE: This table reports the results from 10 separate regressions, one per column, each corresponding to a version of Equation (1) in the text. The dependent variable changes in each regression and is indicated in the column headings. The dependent variable corresponds to the fraction of individuals in a county that fall into the indicated quintile of the “counterfactual” earnings distribution. The “counterfactual” earnings distribution is calculated separately by each county×race×sex for those individuals in each county×race×sex for which the daily average temperature did not exceed 32C during gestation. Robust standard errors, clustered by state, are in parentheses. All regressions control for birth-county×day-of-year×race×sex fixed effects, year fixed effects, and a cubic polynomial in precipitation. \*\*\*p< 0.01, \*\*p< 0.05, \*p< 0.1.

559  
560  
561  
562  
563  
564  
565  
566  
567  
568  
569  
570  
571  
572  
573  
574  
575  
576  
577  
578  
579  
580  
581  
582  
583  
584  
585  
586  
587  
588  
589  
590  
591  
592  
593  
594  
595  
596  
597  
598  
599  
600  
601  
602  
603  
604  
605  
606  
607  
608  
609  
610  
611  
612  
613  
614  
615  
616  
617  
618  
619  
620

621 We have also explored later ages of exposure to see whether  
622 we continue to observe effects of days with mean temperature  
623 above 32C. Table S5 presents estimates where we include  
624 temperature exposures experienced between 12 and 36 months  
625 post-birth. We see very little effect of exposure in these later  
626 ages. Moreover, effects at 6-12 months are also not statistically  
627 significantly different from zero, albeit with larger standard  
628 errors. To sum up, effects are apparent during the fetal stage  
629 and shortly after birth, and then fade out towards the end of  
630 the first year of life.

631 **Table S5. Effects of Temperature over Different Critical Periods on**  
632 **Age 29-31 Annual Earnings, Additional Ages of Exposure**

|               | # Days<br><0C       | # Days<br>24-28C  | # Days<br>28-32C     | # Days<br>32+C       |
|---------------|---------------------|-------------------|----------------------|----------------------|
|               | (1a)                | (1b)              | (1c)                 | (1d)                 |
| 1st Trimester | -6.059**<br>(2.738) | -4.064<br>(5.223) | -10.95**<br>(5.069)  | -56.48**<br>(27.62)  |
| 2nd Trimester | -2.235<br>(2.899)   | 0.291<br>(3.874)  | -7.823<br>(8.149)    | -23.28<br>(15.81)    |
| 3rd Trimester | -3.322<br>(4.906)   | -1.064<br>(2.717) | -13.70***<br>(4.443) | -58.51***<br>(18.60) |
| 0-3 Months    | -1.954<br>(3.234)   | -2.271<br>(4.513) | -19.28***<br>(6.361) | -30.55***<br>(10.98) |
| 3-6 Months    | -1.769<br>(3.093)   | -2.120<br>(5.124) | -14.74**<br>(6.542)  | -78.81***<br>(13.71) |
| 6-12 Months   | 1.730<br>(4.543)    | -0.737<br>(2.513) | -6.915**<br>(3.280)  | -22.12<br>(18.92)    |
| 1-3 Years     | -4.889**<br>(2.442) | -4.964<br>(3.474) | -2.446<br>(3.778)    | 0.462<br>(6.364)     |

653 NOTE: This table reports regression coefficients from a version of Equation  
654 (1) in the text. Robust standard errors, clustered by state, are  
655 in parentheses. Regressions control for daily mean total suspended  
656 particulate pollution, birth-county×day-of-year×race×sex fixed effects,  
657 year fixed effects, and a cubic polynomial in precipitation. \*\*\*p< 0.01,  
658 \*\*p< 0.05, \*p< 0.1.

660 We further explore the sensitivity of our results to measuring  
661 earnings at different follow-up ages. Table S6 presents  
662 results, where each column corresponds to a different regression  
663 using earnings at age 28 through 32 as outcomes. Column  
664 (6) replicates estimates from Table 1 as a basis for comparison.  
665 In each earnings year, the results are qualitatively consistent  
666 with the baseline results from before; a day with mean temperature  
667 exceeding 32C predicts reductions in earnings at all  
668 of the ages we consider. While there is some heterogeneity  
669 across age categories, the confidence intervals overlap across  
670 all groups.

671 An important concern for our analysis is that the temperature  
672 variation is picking up some unobserved, differential,  
673 time-varying shocks across counties. We investigate this possibility  
674 in a number of ways. First, Table S7 presents results from our  
675 baseline model in which we include leads in temperature data for  
676 the same county-day two years prior to birth. In other words,  
677 for each individual, we calculate his hypothetical exposure to  
678 temperature in each critical period *had he or she been born 2 years*  
679 *before his or her actual date of birth.* Our leads should thus be  
680 uncorrelated with the actual treatment effect of exposure during  
681 gestation or in the first year of life. Table S7 presents results from  
682 a single regression, where

column (1a) of Table S7 shows the lead coefficients, while  
column (1b) shows the coefficients on exposure by trimester  
and through age 12 months. For parsimony, we only report  
coefficients on the 32C temperature bin (we are not able to  
reject the null hypothesis from an F-test that the non-32C  
and above temperature coefficients are equal to zero). We find  
that exposure to extreme heat two years before birth is uncor-  
related with age-30 earnings, while the coefficients on actual  
early-life exposure to hot temperature remain negative, larger  
in absolute magnitude, and mostly statistically significant.

There is also growing evidence suggesting that there is  
important seasonal variation in birth outcomes which corre-  
lates with demographic characteristics (22, 32–35). If certain  
populations give birth in periods of very warm temperatures  
and those groups are more economically disadvantaged for  
reasons unrelated to temperature, then we could falsely at-  
tribute temperature variation to this omitted variable. For this  
reason, all of the results we have presented attempt to control  
for this differential seasonality by including race×sex×birth-  
county×birth-day-of-year fixed effects. Nevertheless, we in-  
vestigate how differential fertility that is correlated with extreme  
temperatures may affect conclusions or lead to biases in mod-  
els without county×day-of-year×race×sex fixed effects. We  
begin by using the LEHD earnings records to form a predictive  
earnings index based on sex and race of workers: We use the  
individual-level data to estimate earnings regressions control-  
ling for sex and race indicators and county×day-of-year fixed  
effects, and then use the predicted values from this regression as  
a summary index measure of demographic change or sorting as  
in (31). We estimate a regression model using this index as the  
outcome and with birth-county×birth-day-of-year fixed effects  
(as opposed to our baseline race×sex×birth-county×birth-day-  
of-year fixed effects) to ask whether there is a relationship  
between observable characteristics of the population and the  
temperature variation in our data. Table S8 provides mixed  
evidence on whether more disadvantaged populations (as in-  
dicated by lower predicted earnings) disproportionately experi-  
ence extreme temperatures during gestation. Namely, only  
one out of the six estimates for very hot days is significant at  
10%, and while four out of six signs are negative, the mag-  
nitudes of the estimates are much smaller than our baseline  
estimates. Nevertheless, we believe that differential fertility  
that covaries with the observed temperature variation may  
be an important source of bias, and we therefore control for  
race×sex×birth-county×birth-day-of-year fixed effects in all  
of our other regression models.

It is also worth noting that we would be most concerned  
with direct fertility responses biasing the trimester 1 estimates,  
given such responses would occur due to temperature swings  
during and immediately preceding conception. However, the  
positive auto-correlation in temperature would imply that if  
the first trimester was downwardly biased, a regression with  
separate coefficients for each trimester would then likely lead to  
upwardly biased estimates for the second and third trimesters  
and other critical periods. Yet, we also find negative earnings  
effects in these other periods, which further suggests this issue  
is not driving our results.

Another concern is that temperature exposure is correlated  
with exposure to air pollution, which, in prior work, we have  
found to impact adult earnings (31). To address this possi-  
bility, we have investigated how the inclusion of controls for



**Table S6. Effect of Temperature During Gestation on Adult Annual Earnings: Different Ages of Follow-up**

|               | (1)<br>Age 28         | (2)<br>Age 29        | (3)<br>Age 30        | (4)<br>Age 31         | (5)<br>Age 32          | (6)<br>Age 29-31     |
|---------------|-----------------------|----------------------|----------------------|-----------------------|------------------------|----------------------|
| # Days < 0C   | 1.862<br>(5.770)      | 2.532<br>(5.130)     | 1.882<br>(4.002)     | 1.226<br>(3.579)      | 2.442<br>(4.905)       | 1.303<br>(4.051)     |
| # Days 24-28C | 1.187<br>(1.872)      | -0.314<br>(1.988)    | -0.814<br>(1.826)    | -0.630<br>(1.969)     | -0.501<br>(3.174)      | -0.534<br>(1.719)    |
| # Days 28-32C | 5.200<br>(4.477)      | 2.730<br>(3.860)     | -2.592<br>(4.268)    | -7.789*<br>(4.543)    | -20.959**<br>(10.184)  | -3.434<br>(3.941)    |
| # Days 32+C   | -37.747**<br>(18.632) | -26.518*<br>(14.931) | -27.253*<br>(14.455) | -27.647**<br>(13.234) | -61.154***<br>(23.690) | -28.230*<br>(14.714) |

NOTE: This table reports the results from 6 separate regressions, one per column, each corresponding to a version of Equation (1) in the text. Robust standard errors, clustered by state, are in parentheses. All regressions control for birth-county × day-of-year × race × sex fixed effects, year fixed effects, and a cubic polynomial in precipitation. \*\*\*p < 0.01, \*\*p < 0.05, \*p < 0.1.

**Table S7. Leads in Temperature Do Not Predict Later-Life Outcomes**

|               | # Days<br>32+C<br>(t-2)<br>(1a) | # Days<br>32+C<br>(t)<br>(1b) |
|---------------|---------------------------------|-------------------------------|
| 1st Trimester | -6.053<br>(10.616)              | -44.090**<br>(18.300)         |
| 2nd Trimester | 9.321<br>(14.944)               | -6.844<br>(19.160)            |
| 3rd Trimester | -9.073<br>(13.829)              | -27.558*<br>(15.137)          |
| 0-3 Months    | 2.540<br>(13.559)               | -25.878*<br>(13.757)          |
| 3-6 Months    | -8.601<br>(14.724)              | -34.787***<br>(12.278)        |
| 6-12 Months   | -16.145<br>(10.805)             | -33.280<br>(22.069)           |

NOTE: This table reports the results from a single regression corresponding to a version of Equation (1) in the text. We augment Equation (1) by including leads in the temperature response variables for temperatures experienced two years prior to birth. Robust standard errors, clustered by state, are in parentheses. All regressions control for birth-county × day-of-year × race × sex fixed effects, year fixed effects, and a cubic polynomial in precipitation. \*\*\*p < 0.01, \*\*p < 0.05, \*p < 0.1.

air pollution affects our findings. It is important to note that only 60 percent of the county × day observations in our original sample have data on daily pollution monitor readings. For this sub-sample, we merge on data on the only monitored pollutant during this time period—total suspended particulates (TSP). We then estimate our baseline regressions, controlling for the daily mean TSP pollution level. The results, presented in Table S9, remain very similar to our main estimates. We thus conclude that our baseline results are robust to including controls for air pollution. Additionally, this analysis suggests that pollution levels are not strongly correlated with our temperature variation (conditional on our controls).

Finally, the results in Table 2 suggest that county-level household AC penetration mitigates nearly all of the observed long-run effect of extremely hot temperature. One concern

when interpreting these results, is that household AC adoption may be correlated with other unobservable determinants of later-life well-being, such as income. We investigate this hypothesis in two ways. First, we estimate whether county-level changes in household AC adoption are correlated with other observed changes in that county that may predict later life outcomes (e.g., per-capita income and population size) using data from the Bureau of Economic Analysis local area employment statistics file. In Column (1) of Table S10, we regress the change in the fraction of households in a county that have AC between 1970 and 1980 on the log change in per-capita income over the same time period. We repeat this exercise using instead the log difference in population growth between 1970 and 1980 as the explanatory variable in Column (2). Lastly, Column (3) of Table S10 includes both the log change in population and the log change in per-capita income jointly in the regression model. In all three specifications, we observe little relationship between within-county changes in per-capita income, changes in population, and changes in household AC adoption.

The second way in which we test the robustness of our finding that AC mitigates the effects of temperatures is to use state-level AC penetration, which is likely to be more exogenous (conditional on our baseline controls) than county-level AC adoption. Table S11 presents results where we interact temperature with average state household AC adoption rates, and the results remain very similar to before.

- Intergovernmental Panel on Climate Change (2014) Climate change 2014: Synthesis report.
- Basu R, Samet JM (2002) Relation between elevated ambient temperature and mortality: a review of the epidemiologic evidence. *Epidemiologic reviews* 24(2):190–202.
- Barreca A, Clay K, Deschenes O, Greenstone M, Shapiro JS (2016) Adapting to climate change: The remarkable decline in the us temperature-mortality relationship over the twentieth century. *Journal of Political Economy* 124(1):105–159.
- Deschênes O, Moretti E (2009) Extreme weather events, mortality, and migration. *The Review of Economics and Statistics* 91(4):659–681.
- Deschênes O, Greenstone M (2011) Climate change, mortality, and adaptation: evidence from annual fluctuations in weather in the us. *American Economic Journal: Applied Economics* 3(4):152–185.
- Huynen MM, Martens P, Schram D, Weijnenberg MP, Kunst AE (2001) The impact of heat waves and cold spells on mortality rates in the dutch population. *Environmental health perspectives* 109(5):463.
- Young JB (2002) Programming of sympathoadrenal function. *Trends in Endocrinology & Metabolism* 13(9):381–385.
- Knobel R, Holditch-Davis D (2007) Thermoregulation and heat loss prevention after birth and during neonatal intensive-care unit stabilization of extremely low-birthweight infants. *Journal of Obstetric, Gynecologic, & Neonatal Nursing* 36(3):280–287.
- Deschênes O, Greenstone M, Guryan J (2009) Climate change and birth weight. *The American Economic Review* 99(2):211–217.

**Table S8. The Conditional Relationship Between Temperatures and Predicted Earnings**

|               | # Days<br><0C<br>(1a) | # Days<br>24-28C<br>(1b) | # Days<br>28-32C<br>(1c) | # Days<br>32+C<br>(1d) |
|---------------|-----------------------|--------------------------|--------------------------|------------------------|
| 1st Trimester | -1.225*<br>(0.649)    | -0.246<br>(0.592)        | -0.642<br>(0.869)        | 5.212<br>(3.227)       |
| 2nd Trimester | -0.100<br>(0.656)     | -0.058<br>(0.956)        | -2.547**<br>(1.072)      | -4.905*<br>(2.840)     |
| 3rd Trimester | -1.238*<br>(0.695)    | -1.001<br>(0.716)        | -3.304***<br>(1.026)     | -6.438<br>(4.115)      |
| 0-3 Months    | -0.811<br>(0.719)     | -0.536<br>(0.720)        | -1.894*<br>(1.034)       | -3.189<br>(3.488)      |
| 3-6 Months    | -0.697<br>(0.598)     | -0.105<br>(0.743)        | -0.754<br>(1.139)        | -2.748<br>(3.206)      |
| 6-12 Months   | 0.451<br>(0.610)      | 0.549<br>(0.445)         | -0.299<br>(0.683)        | 1.326<br>(2.617)       |

NOTE: This table reports the results from a single regression corresponding to a version of Equation (1) in the text. The dependent variable in the regression is a predicted earnings index created in an auxiliary regression of age 29-31 earnings on a series of indicator variables for race and sex. We use the predictions from the auxiliary regression as the dependent variable in this table as a summary index measure of demographic sorting/change. Robust standard errors, clustered by state, are in parentheses. All regressions control for birth-county × day-of-year × race × sex fixed effects, year fixed effects, and a cubic polynomial in precipitation. \*\*\*p < 0.01, \*\*p < 0.05, \*p < 0.1.

**Table S9. Effects of Temperature over Different Critical Periods on Age 29-31 Annual Earnings, Controlling for Pollution**

|               | # Days<br><0C<br>(1a) | # Days<br>24-28C<br>(1b) | # Days<br>28-32C<br>(1c) | # Days<br>32+C<br>(1d) |
|---------------|-----------------------|--------------------------|--------------------------|------------------------|
| 1st Trimester | -2.869<br>(4.045)     | -5.093<br>(4.650)        | -18.72***<br>(5.987)     | -78.84**<br>(31.99)    |
| 2nd Trimester | -2.422<br>(3.629)     | -1.349<br>(3.750)        | -13.48<br>(8.701)        | -29.56*<br>(15.98)     |
| 3rd Trimester | -7.389<br>(4.932)     | -3.291<br>(3.585)        | -14.62***<br>(4.819)     | -77.52**<br>(30.19)    |
| 0-3 Months    | -6.708*<br>(3.443)    | -1.931<br>(4.802)        | -19.95***<br>(5.804)     | -45.70***<br>(17.70)   |
| 3-6 Months    | -3.161<br>(2.634)     | -1.096<br>(4.758)        | -11.98*<br>(6.608)       | -94.03***<br>(18.78)   |
| 6-12 Months   | -2.061<br>(4.391)     | -0.274<br>(2.165)        | -5.890*<br>(3.041)       | -39.42<br>(27.68)      |

NOTE: This table reports regression coefficients from a version of Equation (1) in the text. Robust standard errors, clustered by state, are in parentheses. Regression controls for daily mean total suspended particulate pollution, birth-county × day-of-year × race × sex fixed effects, year fixed effects, and a cubic polynomial in precipitation. \*\*\*p < 0.01, \*\*p < 0.05, \*p < 0.1.

10. Barreca A, Deschenes O, Guldi M (2015) Maybe next month? temperature shocks, climate change, and dynamic adjustments in birth rates. (National Bureau of Economic Research), Technical report.

11. Group IW, et al. (2013) Technical update on the social cost of carbon for regulatory impact analysis-under executive order 12866. *Interagency Working Group on Social Cost of Carbon, United States Government*.

12. Gallup JL, Sachs JD, Mellinger AD (1999) Geography and economic development. *International regional science review* 22(2):179-232.

13. Barrios S, Bertinelli L, Strobl E (2010) Trends in rainfall and economic growth in africa: A neglected cause of the african growth tragedy. *The Review of Economics and Statistics* 92(2):350-366.

14. Dell M, Jones B, Olken B (2012) Temperature shocks and economic growth: Evidence from the last half century. *American Economic Journal: Macroeconomics* 4(3):66-95.

15. Hsiang S (2010) Temperatures and cyclones strongly associated with economic production in the caribbean and central america. *Proceedings of the National Academy of Sciences* 107(35):15367-15372.

16. Maccini S, Yang D (2009) Under the weather: Health, schooling, and economic consequences of early-life rainfall. *American Economic Review* 99(3):1006-1026.

17. Graff-Zivin J, Neidell MJ (Forthcoming) Temperature and the allocation of time: Implications for climate change.

18. Hsiang S, Jina A (2012) The causal effect of environmental catastrophe on long-run economic growth. *Working Paper*.

19. Heal G, Park J (2013) Feeling the heat: Temperature, physiology & the wealth of nations, (National Bureau of Economic Research), Working Paper 19725.

20. Rogot E, Sorlie PD, Backlund E (1992) Air-conditioning and mortality in hot weather. *American Journal of Epidemiology* 136(1):106-116.

21. Armstrong LE, Maresh CM (1991) The induction and decay of heat acclimatisation in trained athletes. *Sports Medicine* 12(5):302-312.

22. Buckles KS, Hungerman DM (2008) Season of birth and later outcomes: Old questions, new answers. *Review of Economics and Statistics* (0).

23. Schlenker W, Roberts M (2009) Nonlinear temperature effects indicate severe damages to us crop yields under climate change. *Proceedings of the National Academy of Sciences* 106(37):15594-15598.

24. Deryugina T, Hsiang SM (2014) Does the environment still matter? daily temperature and income in the united states. (National Bureau of Economic Research), Working Paper 20750.

25. Angrist JD, Krueger AB (1999) Empirical strategies in labor economics. *Handbook of labor economics* 3:1277-1366.

26. Black S, Devereux P, Salvanes K (2007) From the cradle to the labor market? the effect of birth weight on adult outcomes. *The Quarterly Journal of Economics* 122(1):409-439.

27. Almond D, Currie J, Duque V (2017) Childhood circumstances and adult outcomes: Act ii, (National Bureau of Economic Research), Working Paper 23017.

28. Yi J, Heckman JJ, Zhang J, Conti G (2014) Early health shocks, intrahousehold resource allocation, and child outcomes. (National Bureau of Economic Research), Working Paper 20757.

29. Chetty R, et al. (2011) How does your kindergarten classroom affect your earnings? evidence from project star. *Quarterly Journal of Economics* 126(4):749-804.

30. Chetty R, Friedman J, Rockoff J (2011) The long-term impacts of teachers: Teacher value-added and student outcomes in adulthood, (National Bureau of Economic Research), Technical report.

31. Isen A, Rossin-Slater M, Walker WR (2017) Every breath you take-every dollar you'll make: The long-term consequences of the clean air act of 1970. *Journal of Political Economy* 125(3):848-902.

32. Currie J, Schwandt H (2013) Within-mother analysis of seasonal patterns in health at birth. *Proceedings of the National Academy of Sciences* 110(30):12265-12270.

33. Wilde J, Apouey BH, Jung T (2017) The effect of ambient temperature shocks during conception and early pregnancy on later life outcomes. *European Economic Review*.

34. Darrow LA, et al. (2009) Seasonality of birth and implications for temporal studies of preterm birth. *Epidemiology (Cambridge, Mass.)* 20(5):699.

35. Lam DA, Miron JA, Riley A (1994) Modeling seasonality in fecundability, conceptions, and births. *Demography* 31(2):321-346.

36. Abowd JM, et al. (2008) The lehd infrastructure files and the creation of the quarterly workforce indicators. *LEHD Working Paper*.



**Table S10. The Relationship Between 1970-1980 Changes in County Level Household AC Adoption and Changes in Population/Income**

|                     | (1)               | (2)               | (3)               |
|---------------------|-------------------|-------------------|-------------------|
| Δ Population        | -0.006<br>(0.047) |                   | -0.002<br>(0.048) |
| Δ Income Per Capita |                   | -0.018<br>(0.039) | -0.018<br>(0.040) |
| N                   | 3072              | 3072              | 3072              |

NOTE: This table reports estimates from three separate regressions where an observation is a county. The dependent variable in each regression is the county-level change in the fraction of households with air conditioning between 1970 and 1980. The independent variables are both reported in log differences, and the coefficients correspond to elasticities. Data on population and income per capita (in real 2008\$) are from the BEA's Local Area Employment Statistics file. Robust standard errors, clustered by state, are in parentheses. \*\*\*p < 0.01, \*\*p < 0.05, \*p < 0.1.

**Table S11. Adaptation Mechanisms: Air Conditioning Exposure, State-Level AC**

|               | # Days<br>28-32C<br>(1a) | # Days<br>32+C<br>(1b) | # Days<br>28-32C×AC<br>(1c) | # Days<br>32+C×AC<br>(1d) |
|---------------|--------------------------|------------------------|-----------------------------|---------------------------|
| 1st Trimester | -6.781<br>(19.765)       | -97.255<br>(74.308)    | 16.425<br>(35.179)          | 122.951<br>(69.478)       |
| 2nd Trimester | -0.037<br>(22.337)       | -24.283<br>(39.566)    | 16.588<br>(35.179)          | 105.348<br>(69.478)       |
| 3rd Trimester | 5.973<br>(18.905)        | -25.627<br>(25.344)    | -7.247<br>(31.221)          | 52.053<br>(66.372)        |
| 0-3 Months    | -38.424**<br>(18.160)    | -89.775***<br>(17.791) | 65.288**<br>(28.793)        | 171.998***<br>(45.078)    |
| 3-6 Months    | -1.092<br>(17.010)       | -39.524<br>(48.803)    | 8.755<br>(25.032)           | 79.608<br>(74.719)        |
| 6-12 Months   | -39.641***<br>(13.757)   | -70.785**<br>(28.366)  | 61.000***<br>(19.356)       | 135.587***<br>(33.973)    |

NOTE: This table reports the results from a single regression model corresponding to a version of Equation (2) in the text. The regression model augments Equation (1) by including an additional set of temperature response coefficients, now interacted with the fraction of households in the State that have household air conditioning. Robust standard errors, clustered by state, are in parentheses. All regressions control for birth-county×day-of-year×race×sex fixed effects, year fixed effects, and a cubic polynomial in precipitation. \*\*\*p < 0.01, \*\*p < 0.05, \*p < 0.1.

- 37. McKinney KL, Vilhuber L (2008) Lehd infrastructure files in the census rdc - overview. *LEHD Working Paper Revision* : 219.
- 38. Mincer J (1974) Schooling, experience, and earnings. *National Bureau of Economic Research*.
- 39. Murphy KM, Welch F (1990) Empirical age-earnings profiles. *Journal of Labor economics* pp. 202–229.
- 40. Conley TG (1999) Gmm estimation with cross sectional dependence. *Journal of econometrics* 92(1):1–45.
- 41. Fisher AC, Hanemann WM, Roberts MJ, Schlenker W (2012) The economic impacts of climate change: evidence from agricultural output and random fluctuations in weather: comment. *The American Economic Review* 102(7):3749–3760.
